# Supplementary material for: Composite Materials from Renewable Resources as Sustainable Corrosion Protection Coatings
Source: MDPI journal article supplement (doi:10.3390/polym13213792), 2021-11-02
Supplement: s1 [file s1]

## Supplementary Materials

### Composite Materials from Renewable Resources as Sustainable Corrosion Protection Coatings

*Polymers* **2021**, *13*(21), 3792; <https://doi.org/10.3390/polym13213792>

Supplementary Materials

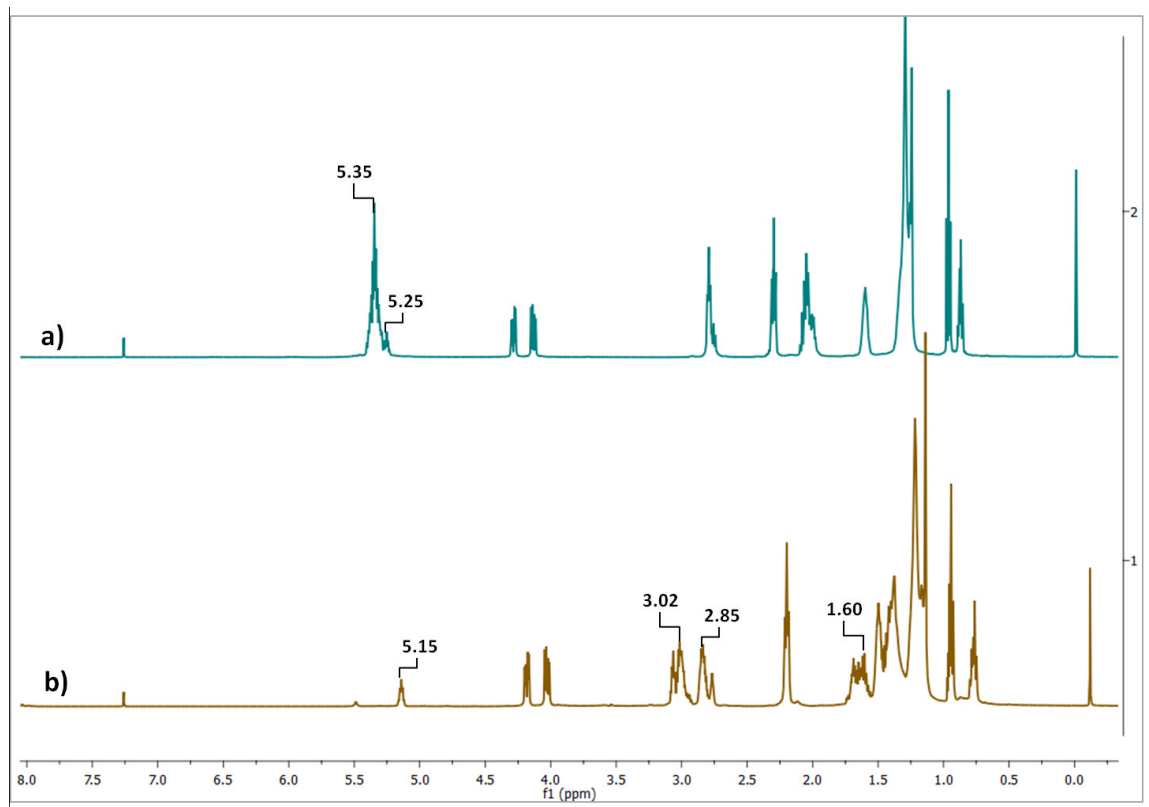

Figure S1 –  $^1\text{H}$ -NMR spectra of a) crude LO and b) epoxidized LO

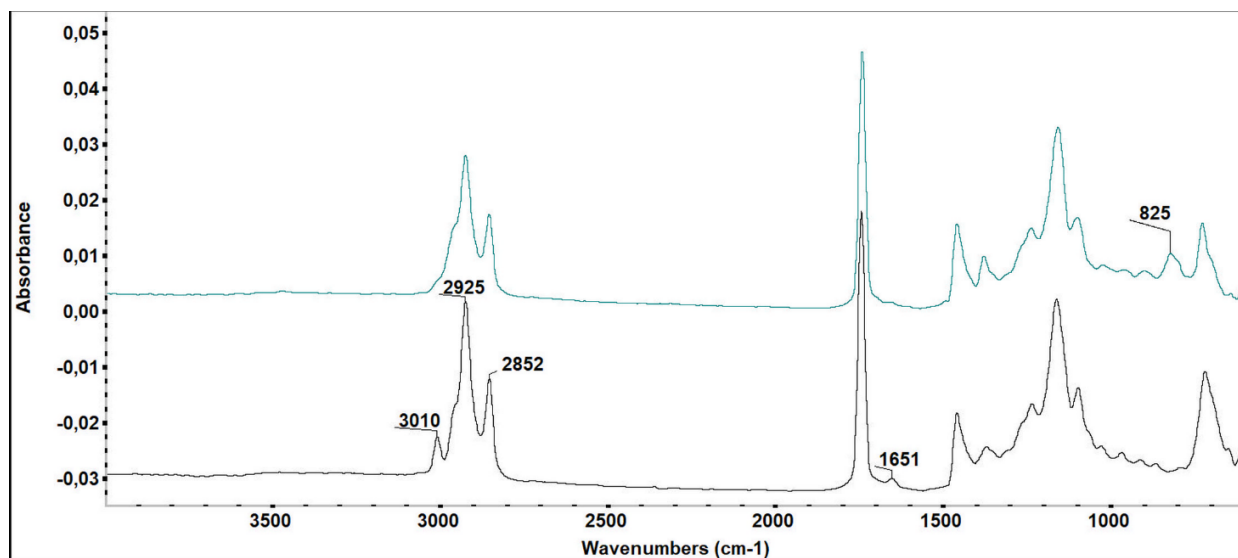

Figure S2 – FTIR spectra of crude LO (a) and epoxidized LO (b)

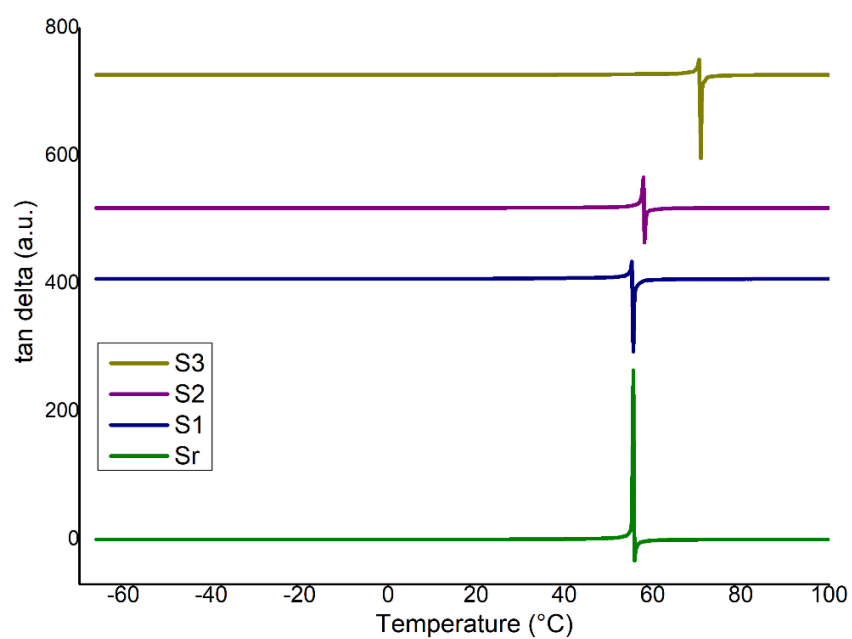

Figure S3 – Tan delta versus temperature registered for the ELO-LnK materials

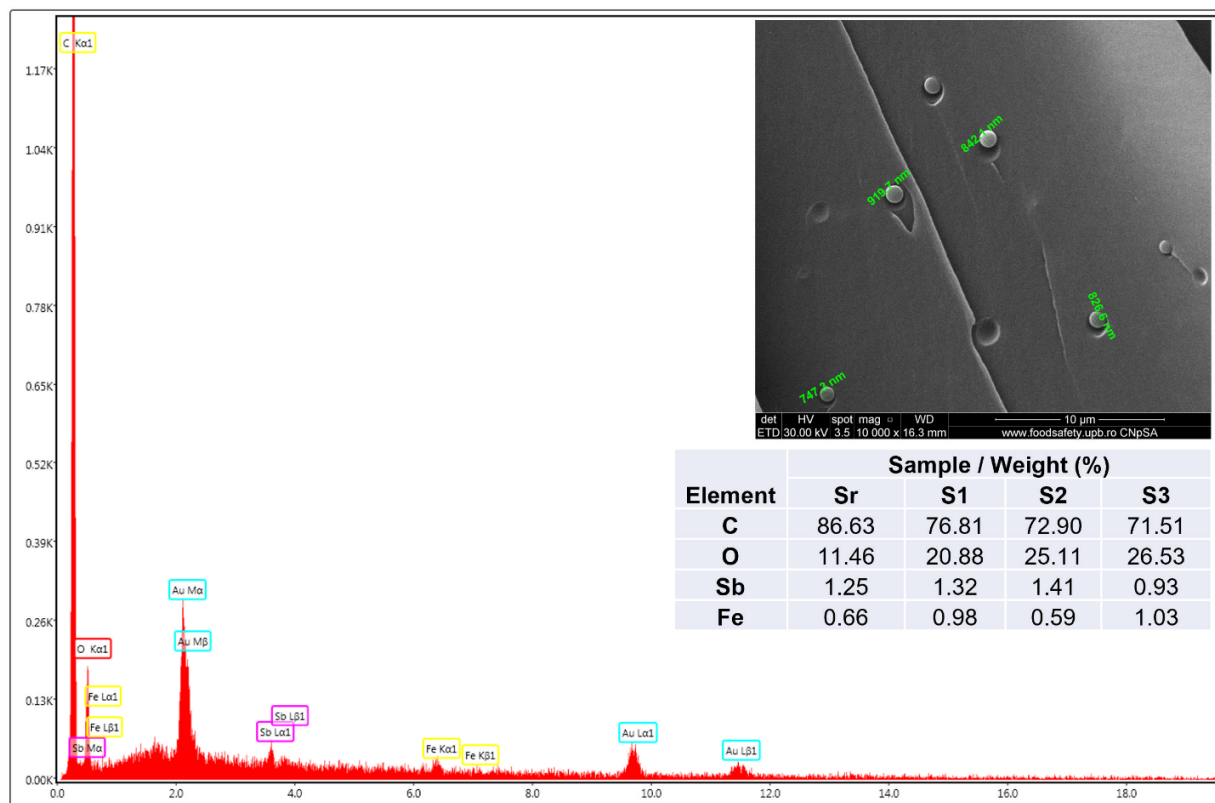

Figure S4 – Qualitative SEM-EDX for Sr sample (SEM at 10000x magnification). Insert: quantitative results for ELO-based composites
